# Supplementary material
Source: publisher site journal article supplement (https://www.dovepress.com/article/525692)
Supplement: Supplementary file 1 [file Supplementary%20material_FINAL%2525252806062025%25252529_1.docx]

**Supplementary material**

**Appendix 1**

**Table A1. Overview of used presurgical predictors.** BMI: body mass index, ENT: ear, nose and throat. NSAIDs: Nonsteroidal anti-inflammatory drugs, NRS: numerical rating scale, APAIS: Amsterdam Preoperative Anxiety and Information Scale, HRQoL: Health-related quality of life, HADS: Hospital Anxiety and Depression Scale, STAI-T: State-Trait Anxiety Inventory. a Kalkman prediction set (11) . b Althaus prediction set (12) , c APAIS (18)

| Presurgical predictors |  | Questions | | | |  |
| --- | --- | --- | --- | --- | --- | --- |
| Demographics |  |  |  |  |  |  |
|  | Age, yr |  |  |  |  |  |
|  | Sex |  |  |  |  |  |
|  | BMI, kg m-2 |  |  |  |  |  |
|  | Level of education, |  |  |  |  |  |
|  | *Low (no secondary grade)* |  |  |  |  |  |
|  | *Intermediate (secondary grade)* |  |  |  |  |  |
|  | *High (higher education)* |  |  |  |  |  |
| Surgical procedure |  |  |  |  |  |  |
| *Kalkman classification* | Ophthalmology |  |  |  |  |  |
|  | Laparoscopy |  |  |  |  |  |
|  | ENT |  |  |  |  |  |
|  | Orthopedic |  |  |  |  |  |
|  | Laparotomy |  |  |  |  |  |
|  | Other |  |  |  |  |  |
| *Periscope classification* | Large procedure with high risk |  |  |  |  |  |
|  | Small procedure with high risk |  |  |  |  |  |
|  | Other |  |  |  |  |  |
| *Surgical-7 classification* | Breast surgery |  |  |  |  |  |
|  | Thoracic surgery |  |  |  |  |  |
|  | Abdominal/intestine surgery |  |  |  |  |  |
|  | Urogenital surgery |  |  |  |  |  |
|  | Amputation surgery |  |  |  |  |  |
|  | Spine and orthopedic prothesis surgery |  |  |  |  |  |
|  | Other |  |  |  |  |  |
| Presurgical medication | Analgesic use |  |  |  |  | Yes- No |
|  | *Opioids* |  |  |  |  | Yes- No |
|  | *Antineuropathics* |  |  |  |  | Yes- No |
| Patient-reported presurgical questionnaires |  |  |  |  |  |  |
|  | Kalkmana prediction |  |  |  |  |  |
|  | *q3* | Indicate your current pain score | | | | 0-10 |
|  | *q4* | I am worried about the anesthetic | | | | 0-5 |
|  | *q5* | The anesthetic is on my mind continually | | | | 0-5 |
|  | *q6* | I would like to know as much as possible about anesthetic | | | | 0-5 |
|  | *q7* | I am worried about the procedure | | | | 0-5 |
|  | *q8* | The procedure is on my mind continually | | | | 0-5 |
|  | *q9* | I would like to know as much as possible about the procedure | | | | 0-5 |
|  | Althausb prediction |  |  |  |  |  |
|  | *q1* | Have you suffered from preoperative pain in the part of the body operated on? | | | | Yes- No |
|  | *q2* | Have you suffered from preoperative pain elsewhere (chronic headache, back pain etc.)? | | | | Yes- No |
|  | *q3* | Have you suffered from capacity overload/overstrain in the past 6 months? | | | | Yes- No |
|  | *q4* | Do you suffer from any of the following symptoms: Sleeping disorder, exhaustibility/exhaustion, frightening thoughts, dizziness, tachycardia, feeling of being  misunderstood, trembling hands, or do you take any sleeping/sedation pills.  (the item is assessed positive if the patient suffers from two or more symptoms) | | | | Yes- No |
|  | Althaus b sum of items |  |  |  |  | 0-4 |
|  | Althaus b risk index |  |  |  |  |  |
|  | *Low* |  |  |  |  |  |
|  | *Moderate* |  |  |  |  |  |
|  | *High* |  |  |  |  |  |
|  | APAIS c |  |  |  |  |  |
|  | *Preoperative anxiety* | Kalkman prediction q4,5,7,8 | | | | 0-20 |
|  | *Preoperative information* | Kalkman prediction q6+q9 | | | | 0-10 |
|  | Estimated incision size |  |  |  |  |  |
|  | *Large (≥ 10 cm)* |  |  |  |  | Yes- No |
|  | HRQoL |  |  |  |  |  |
|  | *EQ-5D-5L index* |  |  |  |  | -0.53 to 1 |
|  | *EQ-5D-5L VAS* |  |  |  |  | 0-100 |
|  | Pain intensity |  |  |  |  |  |
|  | *NRS q1* | Please indicate how much pain in the operation area you are currently experiencing. | | | | 0-10 |
|  | *NRS q2* | Please indicate how much pain you had on average in the past week. | | | | 0-10 |
|  | HADS |  |  |  |  |  |
|  | *Depression* |  |  |  |  | 0-21 |
|  | *Anxiety* |  |  |  |  | 0-21 |
|  | STAI-trait |  |  |  |  | 20-80 |
